# Supplementary material for: Real-time monitoring of a 3D blood–brain barrier model maturation and integrity with a sensorized microfluidic device
Source: PubMed Central journal article supplement (PMC11482549; doi:10.1039/d4lc00633j), 2024-10-07
Supplement: LC-024-D4LC00633J-s001.pdf [file LC-024-D4LC00633J-s001.pdf]

## SUPPORTING INFORMATION

### ***Real-time monitoring of a 3D blood-brain barrier model maturation and integrity with a sensorized microfluidic device***

*Maria Cristina Ceccarelli<sup>1,2\*</sup>, Marie Celine Lefevre<sup>1</sup>, Attilio Marino<sup>1</sup>, Francesca Pignatelli<sup>1</sup>,  
Katarzyna Krukiewicz<sup>3</sup>, Matteo Battaglini<sup>1</sup>; Gianni Ciofani<sup>1\*</sup>*

<sup>1</sup>Istituto Italiano di Tecnologia, Smart Bio-Interfaces, Viale Rinaldo Piaggio 34, 56025 Pontedera,  
Italy

<sup>2</sup>Scuola Superiore Sant'Anna, The BioRobotics Institute, Viale Rinaldo Piaggio 34, 56025  
Pontedera, Italy

<sup>3</sup>Silesian University of Technology, Department of Physical Chemistry and Technology of  
Polymers, Księża Marcina Strzody 9, 44-100 Gliwice, Poland

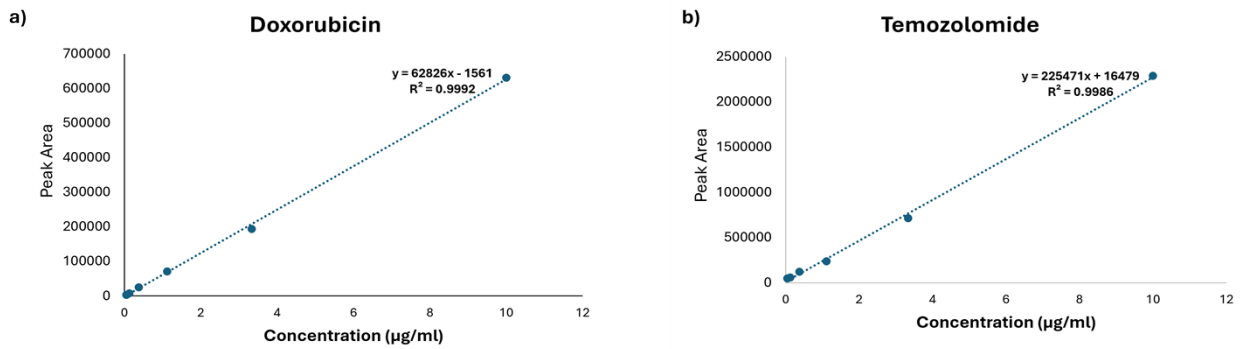

Figure S1. HPLC calibration curves for doxorubicin (a) and temozolomide (b).

| Parameters         | Values                        | Units    |
|--------------------|-------------------------------|----------|
| $R_{TEER}$         | $7588.13 \pm 688.54$          | $\Omega$ |
| $R_{medium}$       | $7035.90 \pm 943$             | $\Omega$ |
| $R_{matrix,cells}$ | $3.10 \pm 5.00 \cdot 10^{10}$ | $\Omega$ |
| $P_{cells,E}$      | $8.90 \pm 0.61 \cdot 10^{-7}$ | -        |
| $n_{cells,E}$      | $0.78 \pm 0.01$               | -        |
| $P_{matrix,cells}$ | $3.30 \pm 1.85 \cdot 10^{-6}$ | -        |
| $n_{matrix,cells}$ | $0.94 \pm 0.05$               | -        |
| $P_{cells}$        | $1.80 \pm 0.43 \cdot 10^{-7}$ | -        |
| $n_{cells}$        | $0.502 \pm 0.004$             | -        |

Table S1. Parameters extracted by fitting the EIS spectrum with the equivalent circuit considering the model, taking into account endothelial cells in the vascular component and the co-culture of astrocytes and microglia in the hydrogel matrix in the parenchymal compartment.

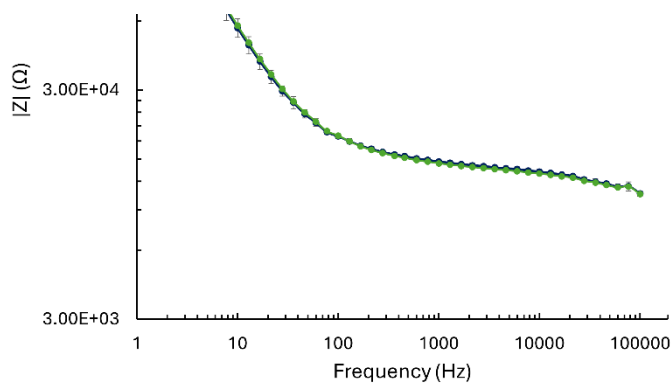

Figure S2. Bode plots of impedance ( $|Z|$ ) versus frequency for the control BBB model before and after the drug crossing experiment.
